# Supplementary material
Source: PubMed Central journal article supplement (PMC5766956)
Supplement: 10.1074_M117.794461_jbc.M117.794461-1.pdf [file 10.1074_M117.794461_jbc.M117.794461-1.pdf]

## **Supplemental Data**

**Title:**

Zinc transporter 2 interacts with vacuolar ATPase and is required for polarization, vesicle acidification and secretion in mammary epithelial cells

**Authors:**

Sooyeon Lee, Olivia C. Rivera and Shannon L. Kelleher

**Materials Included:**

Supplemental Figure S1- ZnT2 Knockdown

Supplemental Figure S2- ZnT2 immunoprecipitation

Supplemental Figure S3- Total protein expression level of V-ATPase in secreting MECs

Supplemental Figure S4- V-ATPase knockdown

Supplemental Figure S1

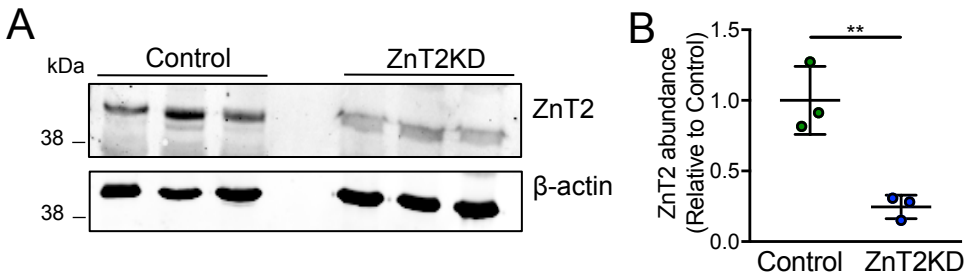

**FIGURE S1. ZnT2 knockdown**

A) Representative immunoblot of ZnT2 in total lysates from mock-transfected (Control) and ZnT2-attenuated cells (ZnT2KD).  $\beta$ -actin served as a loading control. B) Data represent mean normalized signal of ZnT2 relative to Control  $\pm$  SD, n=3 samples/group.; p<0.01\*\*.

Supplemental Figure S2

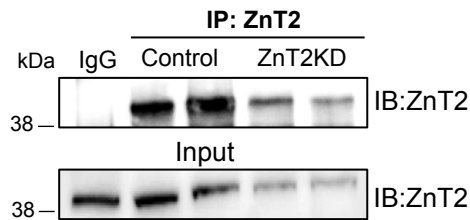

**FIGURE S2. ZnT2 immunoprecipitation**

Representative immunoblots of ZnT2 in immunoprecipitates (IP) from mock-transfected (Control) and ZnT2-attenuated cells (ZnT2KD). IgG served as a negative control.

Supplemental Figure S3

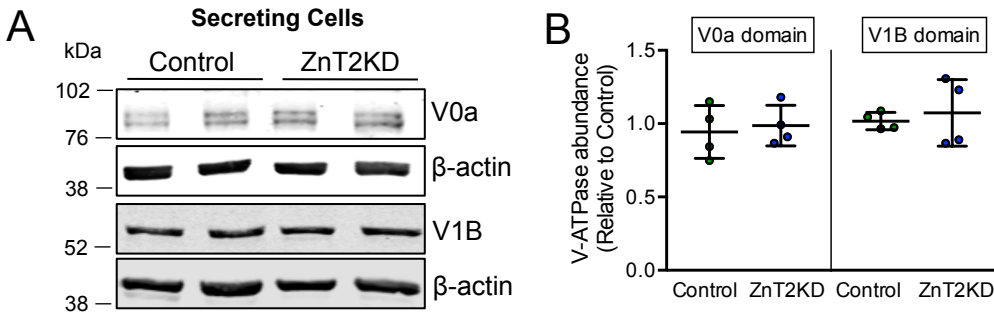

**FIGURE S3. Total protein expression level of V-ATPase in secreting MECs**

A) Representative immunoblot of V-ATPase V0a and V1B domains in total lysates from mock-transfected (Control) and ZnT2-attenuated cells (ZnT2KD) treated with PRL.  $\beta$ -actin served as a loading control. B) Data represent mean normalized signal of V-ATPase V0a and V1B domains relative to Control  $\pm$  SD, n=4 samples/group.

Supplemental Figure S4

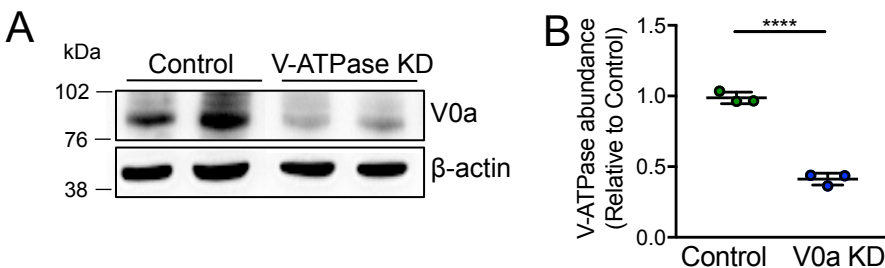

**FIGURE S4. V-ATPase knockdown**

A) Representative immunoblot of V-ATPase V0a in total lysates from mock-transfected (Control) and V-ATPase-attenuated cells (V-ATPase KD).  $\beta$ -actin served as a loading control. B) Data represent mean normalized signal of V-ATPase V0a relative to Control  $\pm$  SD, n=3 samples/group; p<0.0001\*\*\*\*.
